# Supplementary material
Source: Research Square preprint supplement (doi:10.21203/rs.3.rs-8990946/v1)
Supplement: Supplementary file 1 [file 5376aa1c08e93ba5869971ec.docx]

**Supplementary File 1. Questionnaire used to assess surgeons’ awareness, attitudes, and practices regarding Enhanced Recovery After Surgery (ERAS) protocols**

# Section I: Demographic and Operational Information

1. Gender: ☐ Male ☐ Female ☐ Prefer not to state

2. Age: __________

3. Professional category: ☐ Resident ☐ Specialist ☐ Consultant

4. Surgical specialty: ☐ General surgery ☐Anesthesiology

☐ Orthopedics ☐ Gynecology ☐ Urology ☐ Cardiac/thoracic ☐ ENT ☐ Other: __________

5. Years of experience after board certification/specialization: ☐ Less than 5 ☐ 5–<10 ☐ 10–<15 ☐ 15 or more

6. Type of hospital: ☐ Government ☐ Non-government/charity ☐ Private ☐ University/educational

7. Approximate number of surgeries per month: ☐ <10 ☐ 10–<30 ☐ 30–<60 ☐ 60 or more

8. Does your institution have a formal written ERAS protocol? ☐ Yes ☐ No ☐ I don't know

9. Have you received formal ERAS training (course/workshop/certification)? ☐ Yes ☐ No

10. Is there a multidisciplinary team for ERAS (surgery, anesthesia, nursing, nutrition, physical therapy)? ☐ Yes ☐ No ☐ Under development
 Please specify the missing specialty: __________

# Section II: Measuring Objective Awareness of ERAS Fundamentals

*Instruction: Please mark each statement as Correct, Incorrect, or I don't know.*

ERAS begins with preoperative education and continues through the postoperative period ☐ Correct ☐ Incorrect ☐ I don't know

Prolonged fasting before surgery (from midnight for everyone) is a constant requirement in ERAS ☐ Correct ☐ Incorrect ☐ I don't know

Preoperative carbohydrate loading (for appropriate cases) is a common part of ERAS ☐ Correct ☐ Incorrect ☐ I don't know

Goal-directed fluid therapy is a key component of ERAS☐ Correct ☐ Incorrect ☐ I don't know

ERAS aims to avoid fluid overload☐ Correct ☐ Incorrect ☐ I don't know

ERAS recommends early removal of the urinary catheter whenever possible ☐ Correct ☐ Incorrect ☐ I don't know

Early initiation of oral feeding is permitted when feasible ☐ Correct ☐ Incorrect ☐ I don't know

Early mobilization after surgery is one of the pillars of ERAS ☐ Correct ☐ Incorrect ☐ I don't know

Opioid-only anesthesia is recommended in ERAS ☐ Correct ☐ Incorrect ☐ I don't know

Intraoperative thermoregulation is an essential component ☐ Correct ☐ Incorrect ☐ I don't know

ERAS reduces complications in many procedures ☐ Correct ☐ Incorrect ☐ I don't know

ERAS reduces hospital stay in many procedures ☐ Correct ☐ Incorrect ☐ I don't know

Self-awareness: How familiar are you with ERAS protocols? (0 = Not at all, 10 = Very knowledgeable)

0 1 2 3 4 5 6 7 8 9 10

# Section III: Attitudes toward ERAS

*Instruction: Please indicate your level of agreement.*

ERAS significantly improves patient outcomes ☐ Strongly agree ☐ Agree ☐ Neutral ☐ Disagree ☐ Strongly disagree

ERAS is safe for most patients undergoing routine surgical procedures ☐ Strongly agree ☐ Agree ☐ Neutral ☐ Disagree ☐ Strongly disagree

ERAS is practical to implement in Palestinian hospital settings ☐ Strongly agree ☐ Agree ☐ Neutral ☐ Disagree ☐ Strongly disagree

ERAS requires clear institutional commitment to support its success ☐ Strongly agree ☐ Agree ☐ Neutral ☐ Disagree ☐ Strongly disagree

I am willing to participate in the implementation of ERAS ☐ Strongly agree ☐ Agree ☐ Neutral ☐ Disagree ☐ Strongly disagree

I am concerned that ERAS will increase the burden on the surgical team ☐ Strongly agree ☐ Agree ☐ Neutral ☐ Disagree ☐ Strongly disagree

Reducing opioids through multimodal analgesia is an important feature of ERAS ☐ Strongly agree ☐ Agree ☐ Neutral ☐ Disagree ☐ Strongly disagree

Our patients may not accept early mobilization ☐ Strongly agree ☐ Agree ☐ Neutral ☐ Disagree ☐ Strongly disagree

A written protocol will facilitate compliance ☐ Strongly agree ☐ Agree ☐ Neutral ☐ Disagree ☐ Strongly disagree

I prefer traditional methods; I don't see the need for ERAS ☐ Strongly agree ☐ Agree ☐ Neutral ☐ Disagree ☐ Strongly disagree

Short hands-on training is sufficient to start implementing ERAS ☐ Strongly agree ☐ Agree ☐ Neutral ☐ Disagree ☐ Strongly disagree

Measuring indicators for complications is necessary for follow-up ☐ Strongly agree ☐ Agree ☐ Neutral ☐ Disagree ☐ Strongly disagree

Measuring pain indicators is essential for follow-up ☐ Strongly agree ☐ Agree ☐ Neutral ☐ Disagree ☐ Strongly disagree

# Section IV: Current Practice of ERAS Elements

*Instruction: Please indicate how often you apply each element.*

Preoperative education ☐ Always (4) ☐ Mostly (3) ☐ Sometimes (2) ☐ Rarely (1) ☐ Never (0)

Appropriate preoperative nutritional assessment ☐ Always (4) ☐ Mostly (3) ☐ Sometimes (2) ☐ Rarely (1) ☐ Never (0)

Avoid prolonged fasting ☐ Always (4) ☐ Mostly (3) ☐ Sometimes (2) ☐ Rarely (1) ☐ Never (0)

Multimodal prevention of postoperative nausea and vomiting ☐ Always (4) ☐ Mostly (3) ☐ Sometimes (2) ☐ Rarely (1) ☐ Never (0)

Multimodal prevention of postoperative nausea and vomiting (PONV) ☐ Always (4) ☐ Mostly (3) ☐ Sometimes (2) ☐ Rarely (1) ☐ Never (0)

Goal-directed fluid management ☐ Always (4) ☐ Mostly (3) ☐ Sometimes (2) ☐ Rarely (1) ☐ Never (0)

Maintaining normal body temperature ☐ Always (4) ☐ Mostly (3) ☐ Sometimes (2) ☐ Rarely (1) ☐ Never (0)

Reduce opioids ☐ Always (4) ☐ Mostly (3) ☐ Sometimes (2) ☐ Rarely (1) ☐ Never (0)

Use of multimodal analgesia ☐ Always (4) ☐ Mostly (3) ☐ Sometimes (2) ☐ Rarely (1) ☐ Never (0)

Avoid routine intubation and remove tubes early ☐ Always (4) ☐ Mostly (3) ☐ Sometimes (2) ☐ Rarely (1) ☐ Never (0)

Early initiation of oral feeding ☐ Always (4) ☐ Mostly (3) ☐ Sometimes (2) ☐ Rarely (1) ☐ Never (0)

Early mobilization (within 24 hours) ☐ Always (4) ☐ Mostly (3) ☐ Sometimes (2) ☐ Rarely (1) ☐ Never (0)

# Section V: Facilitators and Barriers

Facilitators: Assess the impact of each factor on the implementation of ERAS.

Support from senior management ☐ Very strong (5) ☐ Strong (4) ☐ Average (3) ☐ Weak (2) ☐ No impact (1)

Dedicated multidisciplinary team ☐ Very strong (5) ☐ Strong (4) ☐ Average (3) ☐ Weak (2) ☐ No impact (1)

Written protocol ☐ Very strong (5) ☐ Strong (4) ☐ Average (3) ☐ Weak (2) ☐ No impact (1)

Hands-on training ☐ Very strong (5) ☐ Strong (4) ☐ Average (3) ☐ Weak (2) ☐ No impact (1)

Concise educational materials ☐ Very strong (5) ☐ Strong (4) ☐ Average (3) ☐ Weak (2) ☐ No impact (1)

Periodic quality indicator monitoring systems ☐ Very strong (5) ☐ Strong (4) ☐ Average (3) ☐ Weak (2) ☐ No impact (1)

Potential Obstacles: Assess the impact of each factor.

Shortage of nursing staff ☐ Very strong (5) ☐ Strong (4) ☐ Moderate (3) ☐ Weak (2) ☐ No impact (1)

Shortage of physical therapy staff ☐ Very strong (5) ☐ Strong (4) ☐ Moderate (3) ☐ Weak (2) ☐ No impact (1)

Shortage of nutrition staff ☐ Very strong (5) ☐ Strong (4) ☐ Moderate (3) ☐ Weak (2) ☐ No impact (1)

Limited resources (please specify) ☐ Very strong (5) ☐ Strong (4) ☐ Moderate (3) ☐ Weak (2) ☐ No impact (1)

Resistance to change/conservative institutional culture ☐ Very strong (5) ☐ Strong (4) ☐ Moderate (3) ☐ Weak (2) ☐ No impact (1)

Lack of knowledge about ERAS ☐ Very strong (5) ☐ Strong (4) ☐ Moderate (3) ☐ Weak (2) ☐ No impact (1)

Lack of training on ERAS ☐ Very strong (5) ☐ Strong (4) ☐ Moderate (3) ☐ Weak (2) ☐ No impact (1)

Medical-legal concerns ☐ Very strong (5) ☐ Strong (4) ☐ Moderate (3) ☐ Weak (2) ☐ No impact (1)

Poor patient acceptance of feeding ☐ Very strong (5) ☐ Strong (4) ☐ Moderate (3) ☐ Weak (2) ☐ No impact (1)

Poor patient acceptance of early mobilization ☐ Very strong (5) ☐ Strong (4) ☐ Moderate (3) ☐ Weak (2) ☐ No impact (1)

Poor parental acceptance of feeding ☐ Very strong (5) ☐ Strong (4) ☐ Moderate (3) ☐ Weak (2) ☐ No impact (1)

Poor parental acceptance of early mobilization ☐ Very strong (5) ☐ Strong (4) ☐ Moderate (3) ☐ Weak (2) ☐ No impact (1)

Lack of incentives ☐ Very strong (5) ☐ Strong (4) ☐ Moderate (3) ☐ Weak (2) ☐ No impact (1)

Lack of institutional recognition of ERAS implementation ☐ Very strong (5) ☐ Strong (4) ☐ Moderate (3) ☐ Weak (2) ☐ No impact (1)

# Section VI: Intent and Training Needs

1. How likely are you to adopt ERAS in the next 6–12 months? (0 = Impossible, 10 = Definitely)

0 1 2 3 4 5 6 7 8 9 10

2. What kind of support is most needed to get started?

☐ Short hands-on training

☐ Ready-to-print protocols

☐ Support from management

☐ Appointment of an ERAS coordinator

☐ Quality indicator tracking tools

☐ Other: __________

3. Would you like an accredited workshop on ERAS? ☐ Yes ☐ No

Open question: In your opinion, what are the two most important practical steps to start ERAS in your institution within 3 months?
